# Supplementary material
Source: publisher figshare collection journal article supplement (https://acs.figshare.com/ndownloader/files/7712311)
Supplement: Supplementary file 1 [file 7712311]

# Edge-reconstructed, Few-layered Graphene Nanoribbons: Stability and Electronic Properties

Juliana A. Gonçalves,<sup>†</sup> Regiane Nascimento,<sup>†</sup> Matheus J. S. Matos,<sup>†</sup> Alan B. de  
Oliveira,<sup>†</sup> H lio Chacham,<sup>‡</sup> and Ronaldo J. C. Batista<sup>\*,†</sup>

*Departamento de F sica, Universidade Federal de Ouro Preto, Campus Morro do Cruzeiro,  
35400-000, Ouro Preto, MG, Brazil, and Departamento de F sica, ICEX, Universidade  
Federal de Minas Gerais, CP 702, 30123-970, Belo Horizonte, MG, Brazil*

E-mail: batista.rjc@iceb.ufop.br

---

<sup>\*</sup>To whom correspondence should be addressed

<sup>†</sup>Universidade Federal de Ouro Preto

<sup>‡</sup>Universidade Federal de Minas Gerais

## Supplementary Information

### New carbon structures from reconstructed few-layer graphene edge

We have performed first-principles calculations for the graphene/nanotube hybrid system reported in Ref. 5 under tensile strain. The system, as shown in Fig. 1, consists of a (10,0) carbon nanotube hybridized, through  $sp^3$  bonds, to a five-layer graphene sheet. Tensile strain is applied parallel to the graphene basal plane and perpendicular to the nanotube axis. The left panel of Fig. 1 shows the corresponding stress-strain curve for such strain direction. Particular points in this curve are marked for 10% to 13% strain values, and the corresponding structures of the hybrid system at those strain values are shown in the right panel. The figure shows that, for a strain of 13%, a complete rupture of the hybrid system occurs, with the detachment of the nanotube and the rupture of the five-layer graphene sheet. After further geometry optimization, the border of the ruptured five-layer graphene sheet assumes the geometry of the reconstructed five-layer graphene edge of Fig. 1(c) (see main text).

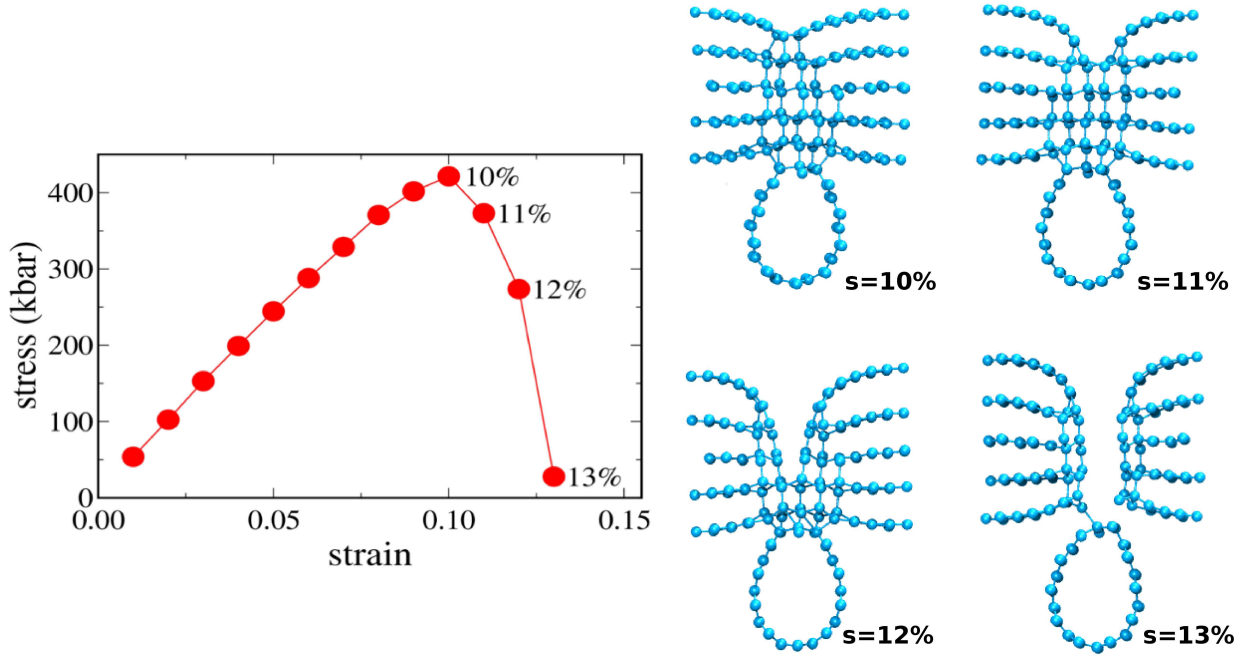

Figure 1: Hybrid system formed by five graphene layers and one (10,0) carbon nanotube under tensile strain applied parallel to the graphene basal plane. On the left, the corresponding stress-strain curve. On the right, final structure for the selected strain values, respectively; 10%, 11%, 12% and 13%, where it is possible to see the rupture of the system.
